# Supplementary material for: Intracellular ATP Signaling Contributes to FAM3A-Induced PDX1 Upregulation in Pancreatic Beta Cells
Source: PubMed Central journal article supplement — Exp Clin Endocrinol Diabetes. 2021 Sep 30;130(8):498–508. doi: 10.1055/a-1608-0607 (PMC9377833; doi:10.1055/a-1608-0607), 2021-09-30
Supplement: 10-1055-a-1608-0607-04-2021-0145.pdf [file 10-1055-a-1608-0607-04-2021-0145.pdf]

## Supplementary Material

**Supplemental Table 1.** siRNA sequence mixture against mouse FAM3A

| Dulex name | Sense                                | Antisense                            |
|------------|--------------------------------------|--------------------------------------|
| FAM3A-1(M) | 5'-UGAACUUCAAGAGAUC<br>AUUGACAUC-3'  | 5'-GAUGUCA AUGAUCUCUUGA<br>AGUUCA-3' |
| FAM3A-2(M) | 5'-UAUUCGAAAGCUCAGG<br>UGCUCUUCA-3'  | 5'-UGAAGAGCACCUGAGCUUU<br>CGAAUA-3'  |
| FAM3A-3(M) | 5'-AUA AUGAUGAUUAGGG<br>CCACGAUGC-3' | 5'-GCAUCGUGGCCCUAAUCAUC<br>AUUAU-3'  |

M: mouse

**Supplemental Table 2.** A list of oligonucleotide primer pairs used in real time RT-PCR and RT-PCR analysis.

| Target Gene          | Sense Primer                   | Antisense Primer               |
|----------------------|--------------------------------|--------------------------------|
| FAM3A(M)             | 5'-TCATGAGCAGCGTCAAAGAC-3'     | 5'-AGGGTACCTTCATGCAGTGG-3'     |
| FAM3A(R)             | 5'-TCATGAGCAGCATCAAGGAC-3'     | 5'-TAGGATGCCACAAACACCAA-3'     |
| PDX-1(M)             | 5'- ACACAGCTCTACAAGGACCC-3'    | 5'- ACTTCCCTGCTCCAGTGATC-3'    |
| PDX-1(R)             | 5'-GAGGACCCGTACAGCCTACA-3'     | 5'-CGTTGTCCCGCTACTACGTT-3'     |
| INS-1(M)             | 5'- CACTTCCTACCCCTGCTGG -3'    | 5'- ACCACAAAGATGCTGTTTGACA -3' |
| INS-1(R)             | 5'- GTCCTCTGGGAGCCCAAG -3'     | 5'- ACAGAGCCTCCACCAGG -3'      |
| INS-2(M)             | 5'- GCTTCTTCTACACACCCATGTC -3' | 5'- AGCACTGATCTACAATGCCAC -3'  |
| INS-2(R)             | 5'- ATCCTCTGGGAGCCCCGC -3'     | 5'- AGAGAGCTTCCACCAAG -3'      |
| $\beta$ -actin (M,R) | 5'- AGCCATGTACGTAGCCATCC-3'    | 5'- GCTGTGGTGGTGAAGCTGTA -3'   |

M: mouse; R: rat
